# Supplementary material for: In Vitro Human Umbilical Vein Endothelial Cells Response to Ionic Dissolution Products from Lithium-Containing 45S5 Bioactive Glass
Source: PubMed Central journal article supplement (PMC5551783; doi:10.3390/ma10070740), 2017-07-03
Supplement: materials-10-00740-s001.pdf [file materials-10-00740-s001.pdf]

# Supplementary Materials: In vitro Human Umbilical Vein Endothelial Cells Response to Ionic Dissolution Products from Lithium-containing 45S5 Bioactive Glass

Luis A. Haro Durand, Gabriela E. Vargas, Rosa Vera-Mesones, Alberto Baldi, María P. Zago, María A. Fanovich, Aldo R. Boccaccini and Alejandro Gorustovich \*

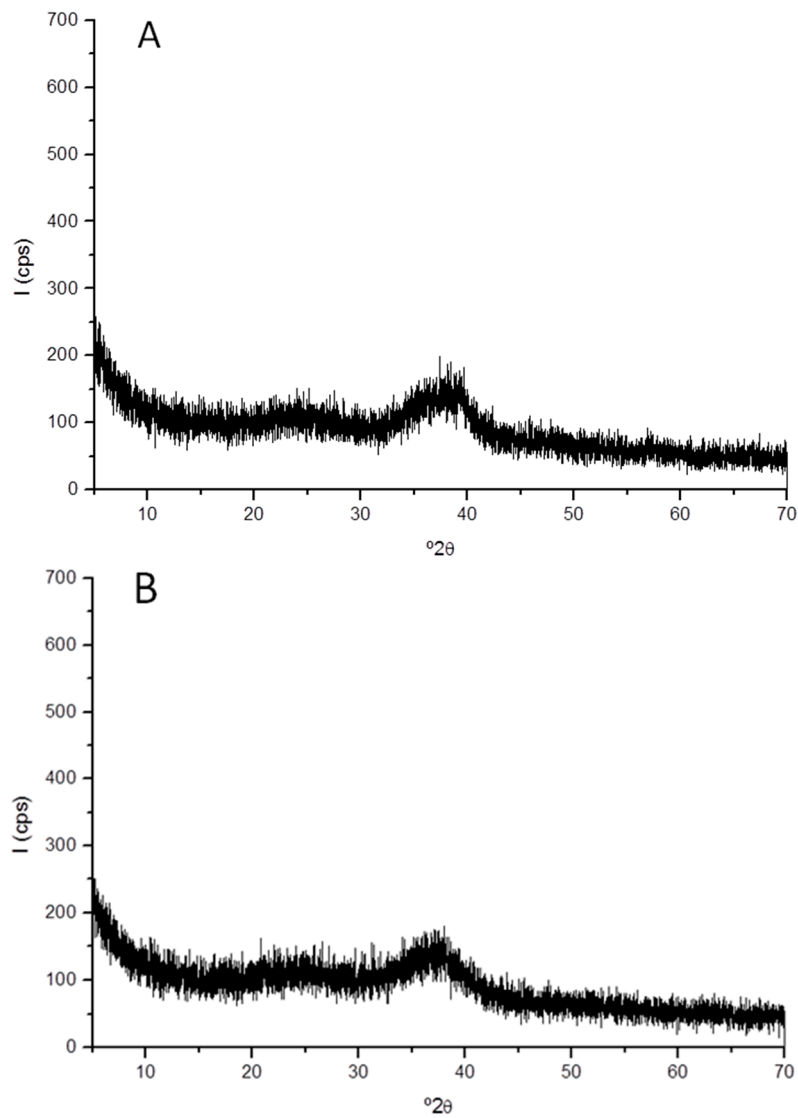

**Figure S1.** X-ray diffraction (XRD) study of the bioactive glasses 45S5 (A) and 45S5.5Li (B) showing the absence of crystalline phases.

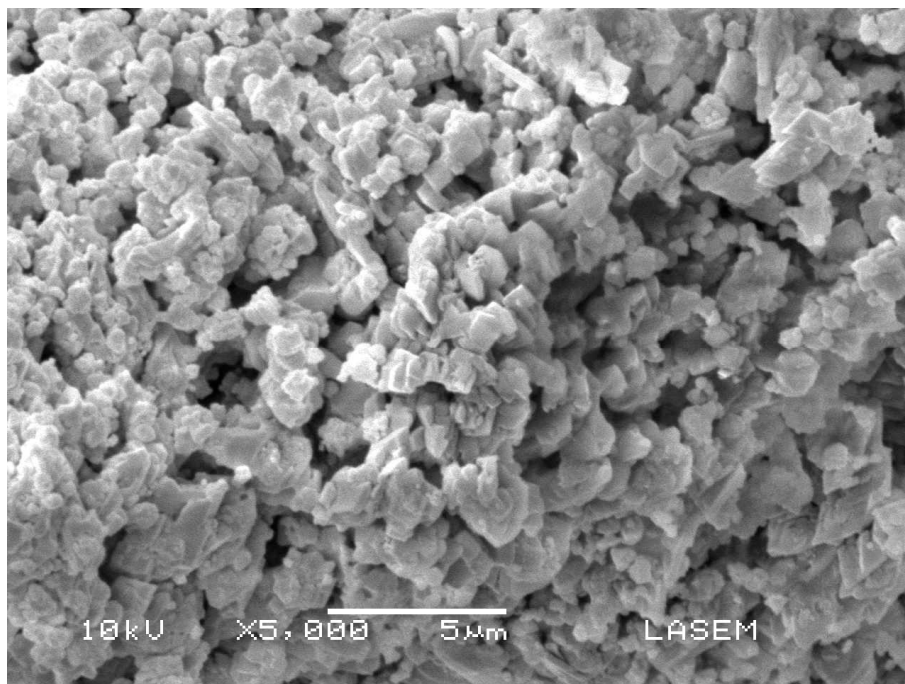

**Figure S2.** Scanning electron microscopy (SEM) of 45S5.5Li microparticles.

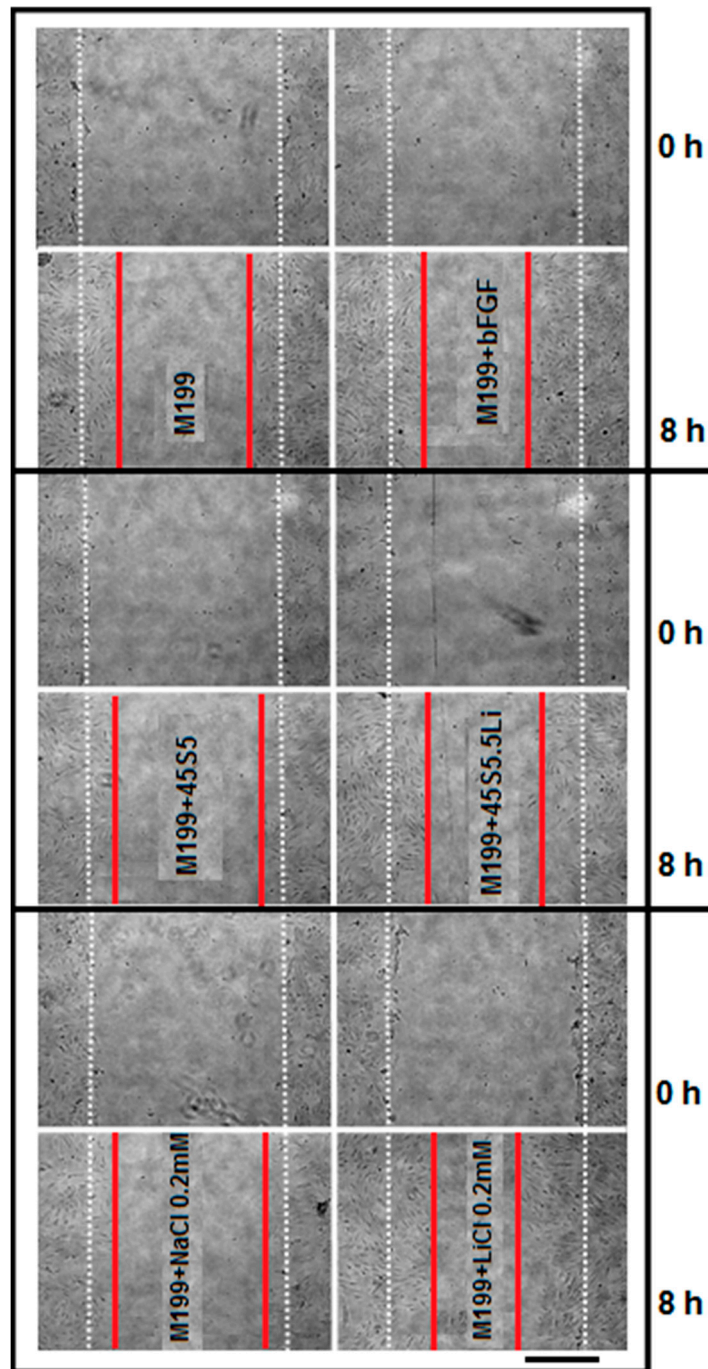

**Figure S3.** Migratory response of HUVECs. Dotted lines indicate the gap at  $t_0$ , while the red full lines delimit the coating of the gap by migration of HUVECs. Scale bar:  $100\mu\text{m}$ .

**Table S1.** Formulation detail of medium M199.

| COMPONENTS               | Molecular Weight | Concentration (mg/L) | mM    |
|--------------------------|------------------|----------------------|-------|
| Amino Acids              |                  |                      |       |
| Glycine                  | 75               | 50                   | 0.667 |
| L-Alanine                | 89               | 25                   | 0.281 |
| L-Arginine hydrochloride | 211              | 70                   | 0.332 |

|                                    |     |       |           |
|------------------------------------|-----|-------|-----------|
| L-Aspartic acid                    | 133 | 30    | 0.226     |
| L-Cysteine hydrochloride-H2O       | 176 | 0.1   | 0.000568  |
| L-Cystine 2HCl                     | 240 | 26    | 0.108     |
| L-Glutamic Acid                    | 147 | 75    | 0.51      |
| L-Glutamine                        | 146 | 100   | 0.685     |
| L-Histidine hydrochloride-H2O      | 210 | 21.88 | 0.104     |
| L-Hydroxyproline                   | 131 | 10    | 0.0763    |
| L-Isoleucine                       | 131 | 40    | 0.305     |
| L-Leucine                          | 131 | 60    | 0.458     |
| L-Lysine hydrochloride             | 183 | 70    | 0.383     |
| L-Methionine                       | 149 | 15    | 0.101     |
| L-Phenylalanine                    | 165 | 25    | 0.152     |
| L-Proline                          | 115 | 40    | 0.348     |
| L-Serine                           | 105 | 25    | 0.238     |
| L-Threonine                        | 119 | 30    | 0.252     |
| L-Tryptophan                       | 204 | 10    | 0.049     |
| L-Tyrosine disodium salt dihydrate | 261 | 58    | 0.222     |
| L-Valine                           | 117 | 25    | 0.214     |
| <b>Vitamins</b>                    |     |       |           |
| Alpha-tocopherol Phosphate         | 702 | 0.01  | 0.0000142 |
| Ascorbic Acid                      | 176 | 0.05  | 0.000284  |
| Biotin                             | 244 | 0.01  | 0.000041  |
| Choline chloride                   | 140 | 0.5   | 0.00357   |
| D-Calcium pantothenate             | 477 | 0.01  | 0.000021  |
| Folic Acid                         | 441 | 0.01  | 0.0000227 |
| Menadione (Vitamin K3)             | 172 | 0.01  | 0.0000581 |
| Niacinamide                        | 122 | 0.025 | 0.000205  |
| Nicotinic acid (Niacin)            | 123 | 0.025 | 0.000203  |
| Para-Aminobenzoic Acid             | 137 | 0.05  | 0.000365  |
| Pyridoxal hydrochloride            | 204 | 0.025 | 0.000123  |
| Pyridoxine hydrochloride           | 206 | 0.025 | 0.000121  |

|                                                                                 |       |       |           |
|---------------------------------------------------------------------------------|-------|-------|-----------|
| Riboflavin                                                                      | 376   | 0.01  | 0.0000266 |
| Thiamine hydrochloride                                                          | 337   | 0.01  | 0.0000297 |
| Vitamin A (acetate)                                                             | 328   | 0.1   | 0.000305  |
| Vitamin D2 (Calciferol)                                                         | 397   | 0.1   | 0.000252  |
| i-Inositol                                                                      | 180   | 0.05  | 0.000278  |
| <b>Inorganic Salts</b>                                                          |       |       |           |
| Calcium Chloride (CaCl <sub>2</sub> ) (anhyd.)                                  | 111   | 200   | 1.8       |
| Ferric nitrate (Fe(NO <sub>3</sub> )-9H <sub>2</sub> O)                         | 404   | 0.7   | 0.00173   |
| Magnesium Sulfate (MgSO <sub>4</sub> ) (anhyd.)                                 | 120   | 97.67 | 0.814     |
| Potassium Chloride (KCl)                                                        | 75    | 400   | 5.33      |
| Sodium Chloride (NaCl)                                                          | 58    | 6800  | 117.24    |
| Sodium Phosphate monobasic (NaH <sub>2</sub> PO <sub>4</sub> -H <sub>2</sub> O) | 138   | 140   | 1.01      |
| <b>Other Components</b>                                                         |       |       |           |
| Adenine sulfate                                                                 | 404   | 10    | 0.0248    |
| Adenosine 5'-phosphate                                                          | 347   | 0.2   | 0.000576  |
| Adenosine 5'-triphosphate                                                       | 605   | 1     | 0.00165   |
| Cholesterol                                                                     | 387   | 0.2   | 0.000517  |
| D-Glucose (Dextrose)                                                            | 180   | 1000  | 5.56      |
| Deoxyribose                                                                     | 134   | 0.5   | 0.00373   |
| Glutathione (reduced)                                                           | 307   | 0.05  | 0.000163  |
| Guanine hydrochloride                                                           | 188   | 0.3   | 0.0016    |
| Hypoxanthine Na                                                                 | 136   | 0.4   | 0.00294   |
| Phenol Red                                                                      | 376.4 | 20    | 0.0531    |
| Ribose                                                                          | 150   | 0.5   | 0.00333   |
| Sodium Acetate                                                                  | 82    | 50    | 0.61      |
| Thymine                                                                         | 126   | 0.3   | 0.00238   |
| Tween 80®                                                                       |       | 20    | ∞         |
| Uracil                                                                          | 112   | 0.3   | 0.00268   |
| Xanthine-Na                                                                     | 152   | 0.3   | 0.00197   |

**Table S2.** Chemical composition of the as-prepared bioactive glasses determined by

inductively coupled plasma mass spectrometry (ICP-MS) (in wt %).

|                 | <b>Li<sub>2</sub>O</b> | <b>SiO<sub>2</sub></b> | <b>P<sub>2</sub>O<sub>5</sub></b> | <b>CaO</b> | <b>Na<sub>2</sub>O</b> |
|-----------------|------------------------|------------------------|-----------------------------------|------------|------------------------|
| <b>45S5</b>     | -                      | 44.97                  | 5.96                              | 24.53      | 24.55                  |
| <b>45S5.5Li</b> | 4.95                   | 44.95                  | 5.99                              | 24.55      | 19.55                  |

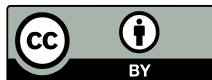

© 2017 by the authors. Submitted for possible open access publication under the terms and conditions of the Creative Commons Attribution (CC BY) license (<http://creativecommons.org/licenses/by/4.0/>).
